# Supplementary material for: Local cross-border disease surveillance and control: experiences from the Mekong Basin
Source: PubMed Central journal article supplement (PMC4374506; doi:10.1186/s13104-015-1047-6), 2015-03-21
Supplement: 13104_2015_1047_MOESM1_ESM.pdf [file 13104_2015_1047_MOESM1_ESM.pdf]

## Cross-Border Disease Surveillance

**(1) XB Site Data**

|                |                                           |                   |                       |                        |
|----------------|-------------------------------------------|-------------------|-----------------------|------------------------|
| <b>Country</b> | <b>XB: which side(s) are operational?</b> | <b>BOTH sides</b> | <b>YOUR side only</b> | <b>OTHER side only</b> |
|----------------|-------------------------------------------|-------------------|-----------------------|------------------------|

**(2) MBDS and Other Basics**

**How aware or familiar are you with the following?** (enter response for each item-see key below)

| <i>Description</i>                     | <i>Response</i> |
|----------------------------------------|-----------------|
| MBDS in general                        |                 |
| MBDS Executive Board                   |                 |
| MBDS Country Coordinator               |                 |
| MBDS Coordinator/Coordinating Office   |                 |
| MBDS Action Plan and strategies        |                 |
| MBDS cross-border (XB) cooperation     |                 |
| Your country's surveillance program    |                 |
| International Health Regulations (IHR) |                 |
| IHR reporting requirements             |                 |
| IHR core capacities                    |                 |

Response Key:

1 = Not at all aware/familiar  
 2 = A little aware/familiar  
 3 = Somewhat aware/familiar  
 4 = Moderately aware/familiar  
 5 = Very aware/familiar

**(3) Values and Context**

**How much do you agree or disagree with the following?** (enter response for each item-see key below)

| <i>Description</i>                                             | <i>Response</i> |
|----------------------------------------------------------------|-----------------|
| MBDS cooperation is important                                  |                 |
| MBDS is a pioneer for cooperation                              |                 |
| Mutual trust is important in MBDS                              |                 |
| Transparency is important in MBDS                              |                 |
| Your work serves MBDS system                                   |                 |
| Your work serves country system                                |                 |
| MBDS is consistent with country surveillance & response system |                 |
| Exercises (TTXs or simulations) and drills are valuable        |                 |

Response Key:

1 = Strongly disagree  
 2 = Disagree  
 3 = Neither disagree or agree  
 4 = Agree  
 5 = Strongly Agree  
 9 = Don't know

**(4) Strategic priorities**

Which are high priorities for your country, MBDS, &/or IHR? (enter response for each-see key)

| <i>Description</i>                           | <i>For Country</i> | <i>For MBDS</i> | <i>For IHR</i>  |
|----------------------------------------------|--------------------|-----------------|-----------------|
|                                              | <i>Response</i>    | <i>Response</i> | <i>Response</i> |
| Infectious disease surveillance              |                    |                 |                 |
| Timely surveillance reporting                |                    |                 |                 |
| Using surveillance information for action    |                    |                 |                 |
| Public health capacity building              |                    |                 |                 |
| Laboratory capacity                          |                    |                 |                 |
| Epidemiology capacity                        |                    |                 |                 |
| Risk communications                          |                    |                 |                 |
| Information/Communications capacity          |                    |                 |                 |
| Surveillance at points of entry              |                    |                 |                 |
| Public health event of international concern |                    |                 |                 |
| Coordination of human & animal health        |                    |                 |                 |

Response Key:  
 0 = No  
 1 = Yes

**(5) Quality of implementation / activities**

How well do you implement the following at your site? (enter response for each item-see key)

| <i>Strategy or Activity</i>                      | <i>Response</i> |
|--------------------------------------------------|-----------------|
| Coordinate, talk &/or meet with XB counterparts  |                 |
| Report surveillance data to country system       |                 |
| Report surveillance data to cross-border partner |                 |
| Report surveillance data to MBDS Coordinator     |                 |
| Use your surveillance information for action     |                 |
| LOCAL outbreak response/investigation            |                 |
| JOINT (XB) outbreak response/investigation       |                 |
| Coordinate human-animal health                   |                 |
| Conduct community-based surveillance             |                 |
| Build and use epidemiology capacity              |                 |
| Conduct lab testing for priority diseases        |                 |
| Use computers for your routine work              |                 |
| Conduct risk communications                      |                 |
| Conduct applied or other research                |                 |

Response Key:  
 1 = Do not implement  
 2 = Implement poorly  
 3 = Implement moderately well  
 4 = Implement very well

**(6) Diseases surveillance**

**6.1. Indicate your response for each of the diseases below**

| <i>Disease</i>                | <b>MBDS surveillance?<br/>(no/yes)</b> | <b>Country surveillance?<br/>(no/yes)</b> | <b>Know Case Definition?<br/>(no/yes)</b> | <b>Reporting FREQUENCY</b> |
|-------------------------------|----------------------------------------|-------------------------------------------|-------------------------------------------|----------------------------|
|                               | <i>Response</i>                        | <i>Response</i>                           | <i>Response</i>                           | <i>Response</i>            |
| Acute flaccid paralysis (AFP) |                                        |                                           |                                           |                            |
| Avian influenza               |                                        |                                           |                                           |                            |
| Chikungunya                   |                                        |                                           |                                           |                            |
| Cholera                       |                                        |                                           |                                           |                            |
| Dengue                        |                                        |                                           |                                           |                            |
| Diphtheria                    |                                        |                                           |                                           |                            |
| Encephalitis                  |                                        |                                           |                                           |                            |
| HIV                           |                                        |                                           |                                           |                            |
| Leptospirosis                 |                                        |                                           |                                           |                            |
| Malaria                       |                                        |                                           |                                           |                            |
| Measles                       |                                        |                                           |                                           |                            |
| Meningitis                    |                                        |                                           |                                           |                            |
| Pneumonia                     |                                        |                                           |                                           |                            |
| SARS                          |                                        |                                           |                                           |                            |
| Tetanus                       |                                        |                                           |                                           |                            |
| Tuberculosis                  |                                        |                                           |                                           |                            |
| Typhoid                       |                                        |                                           |                                           |                            |

Response Key:  
No/Yes questions:  
0 = No  
1 = Yes  
Frequencies:  
1 = 24 hour  
2 = Weekly  
3 = Monthly  
4 = Quarterly

**6.2. What reporting template/s do you use for reporting surveillance data from your site?  
(check ALL that apply)**

Country template  MBDS template  WHO/IHR template

**6.3. What do you personally/routinely do with your surveillance data?  
(check ALL that apply)**

Look at data  Analyze data  Use data  Report data

**6.4. What aspects of surveillance are working best/well at your site, and why?**

**6.5. What aspects of surveillance are not working well at your site, and why?**

**(7) Implementation of specific activities and capacity levels**

Please indicate response for each of the following activities at your site (Key: 0 = No, 1 = Yes)

| <b>Activity or Capacity</b>                                                                                                                                | <b>Response</b> |
|------------------------------------------------------------------------------------------------------------------------------------------------------------|-----------------|
| <i>Cross-border (XB) Cooperation</i>                                                                                                                       |                 |
| Maintain a list of contact information for XB counterparts                                                                                                 |                 |
| Have adopted or adapted a basic package of activities for your site                                                                                        |                 |
| Shared surveillance information weekly, monthly and quarterly as required                                                                                  |                 |
| Participated in at least one meeting with another XB site in the past 6 months                                                                             |                 |
| Participated in at least one supervisory visit in the last 6 months                                                                                        |                 |
| Ever participated in joint outbreak investigation                                                                                                          |                 |
| Participated in at least one outbreak investigation, TTX or drill past 12 months                                                                           |                 |
| <i>Animal-human interface and community-based surveillance</i>                                                                                             |                 |
| Maintain a list of priority zoonotic diseases for XB cooperation                                                                                           |                 |
| Maintain a list of contact information for local animal & human health counterparts                                                                        |                 |
| Participated in outbreak investigation, TTX or drill that at least partially addressed the interface between animal and human health in the past 12 months |                 |
| Regularly share surveillance reports between animal and human health sectors                                                                               |                 |
| Have list of suspected diseases or events to report via community-based surveillance                                                                       |                 |
| Have tested (pilot) or implemented community-based surveillance past 6 months                                                                              |                 |
| Community-based surveillance fully operational at site                                                                                                     |                 |
| <i>Human resource/epidemiology capacity</i>                                                                                                                |                 |
| At least 1 person at site has participated in short- or long-term epidemiology course                                                                      |                 |
| <i>ICT capacity</i>                                                                                                                                        |                 |
| XB site has ICT hardware/software installed, including updates.                                                                                            |                 |
| XB site has received ICT training, including updates as needed.                                                                                            |                 |
| XB site has access to ICT support when needed.                                                                                                             |                 |
| XB site routinely uses ICT for surveillance.                                                                                                               |                 |
| <i>Laboratory capacity</i>                                                                                                                                 |                 |
| Site has laboratory for detecting/diagnosing at least 1 priority disease                                                                                   |                 |
| Site has timely access to lab testing for all priority diseases                                                                                            |                 |
| Laboratory at or serving your site participated in proficiency testing past 12 months                                                                      |                 |
| <i>Risk communications (RC)</i>                                                                                                                            |                 |
| At least 1 person at your site has received risk communications training                                                                                   |                 |
| Your site has used (in a real situation) or tested (via exercise) RC past 12 months                                                                        |                 |

**(8) History, opinions and suggestions**

**8.1. What were the first activities needed to start up MBDS XB work at your site?**

*(Possible examples include visit from national or provincial authorities, meetings within your country, meetings with XB counterparts, development of written or other agreement, training or orientation)*

**8.2 What are currently the most important/valuable activities for MBDS XB work at your site, and why are they important to you?**

**8.3. What are the most important lessons you have learned about XB cooperation?**

**8.4. What advice would you give to other districts/sites (in your country or other countries) that wish to begin XB cooperation?**

**8.5. With regard to sustainability of your XB activities:**

**8.5.1. How important is the sustainability of XB cooperation to you?**

**8.5.2. How confident are you that you will be able to sustain your XB cooperation?**

**8.5.3. What enabling factors would help you sustain your XB cooperation?**

**8.5.4. What barriers would impede sustainability at your XB site?**

**8.6. Please provide any other comments and suggestions for improving MBDS program in your cross border area?**

Thank you for your participation.
